# Supplementary material
Source: PubMed Central journal article supplement (PMC8329745)
Supplement: jamapediatr-e211058-s001.pdf [file jamapediatr-e211058-s001.pdf]

## Supplementary Online Content

Eves R, Mendonça M, Baumann N, et al. Association of very preterm birth or very low birth weight with intelligence in adulthood: an individual participant data meta-analysis. *JAMA Pediatr*. Published online May 28, 2021. doi:10.1001/jamapediatrics.2021.1058

**eTable 1.** Childhood Neurosensory Impairment in VPT/VLBW Participants from Each IPD Cohort

**eTable 2.** Newcastle Ottawa Criteria and Ratings for Each IPD Cohort

**eTable 3.** Linear Mixed Model Demonstrating Reducing Gestational Age by Birth Year Among VPT/VLBW Participants

**eTable 4.** Linear Mixed Model Demonstrating Reducing Birth Weight by Birth Year Among VPT/VLBW Participants

**eTable 5.** IQ and Demographic Information of All Participants from Each IPD Cohort

**eTable 6.** Neonatal and Demographic Data for VPT/VLBW Participants from Each IPD Cohort

**eTable 7.** Study Characteristics of VPT/VLBW Cohorts Not Included in the IPD Meta-analysis

### eReferences

This supplementary material has been provided by the authors to give readers additional information about their work.

**eTable 1.** Childhood Neurosensory Impairment in VPT/VLBW Participants from Each IPD Cohort

|                                      | <b>AYLS</b><br><b>VPT/<br/>VLBW</b><br><b>(n=28)</b> | <b>BLS</b><br><b>VPT/<br/>VLBW</b><br><b>(n=203)</b> | <b>EPICURE</b><br><b>VPT/<br/>VLBW</b><br><b>(n=124)</b> | <b>HESVA</b><br><b>VPT/<br/>VLBW</b><br><b>(n=109)</b> | <b>NTNU</b><br><b>VPT/<br/>VLBW</b><br><b>(n=51)</b> | <b>NZVLBW</b><br><b>VPT/<br/>VLBW</b><br><b>(n=225)</b> | <b>UCLH</b><br><b>VPT/<br/>VLBW</b><br><b>(n=104)</b> | <b>VICS</b><br><b>VPT/<br/>VLBW</b><br><b>(n=224)</b> | <b>Overall</b><br><b>VPT/<br/>VLBW</b><br><b>(n=1068)</b> |
|--------------------------------------|------------------------------------------------------|------------------------------------------------------|----------------------------------------------------------|--------------------------------------------------------|------------------------------------------------------|---------------------------------------------------------|-------------------------------------------------------|-------------------------------------------------------|-----------------------------------------------------------|
| <b>Evidence of Severe NSI</b>        |                                                      |                                                      |                                                          |                                                        |                                                      |                                                         |                                                       |                                                       |                                                           |
| Yes                                  | 3 (10.7%)                                            | 22 (10.8%)                                           | 14 (11.3%)                                               | 5 (4.6%)                                               | 4 (7.8%)                                             | 9 (4.0%)                                                | 3 (2.9%)                                              | 27 (12.1%)                                            | 87 (8.1%)                                                 |
| No                                   | 25<br>(89.3%)                                        | 181<br>(89.2%)                                       | 110<br>(88.7%)                                           | 104<br>(95.4%)                                         | 47<br>(92.2%)                                        | 216<br>(96.0%)                                          | 101<br>(97.1%)                                        | 197<br>(87.9%)                                        | 981<br>(91.9%)                                            |
| <b>Visual Impairment</b>             |                                                      |                                                      |                                                          |                                                        |                                                      |                                                         |                                                       |                                                       |                                                           |
| No                                   | 26<br>(92.9%)                                        | 200<br>(98.5%)                                       | 117<br>(94.4%)                                           | 107<br>(98.2%)                                         | 37<br>(72.5%)                                        | 218<br>(96.9%)                                          | 0 (0%)                                                | 224<br>(100%)                                         | 929<br>(87.0%)                                            |
| Yes                                  | 0 (0%)                                               | 2 (1.0%)                                             | 0 (0%)                                                   | 0 (0%)                                                 | 0 (0%)                                               | 1 (0.4%)                                                | 0 (0%)                                                | 0 (0%)                                                | 3 (0.3%)                                                  |
| Missing                              | 2 (7.1%)                                             | 1 (0.5%)                                             | 7 (5.6%)                                                 | 2 (1.8%)                                               | 14<br>(27.5%)                                        | 6 (2.7%)                                                | 104<br>(100%)                                         | 0 (0%)                                                | 136<br>(12.7%)                                            |
| <b>Hearing Impairment</b>            |                                                      |                                                      |                                                          |                                                        |                                                      |                                                         |                                                       |                                                       |                                                           |
| No                                   | 26<br>(92.9%)                                        | 201<br>(99.0%)                                       | 116<br>(93.5%)                                           | 107<br>(98.2%)                                         | 37<br>(72.5%)                                        | 217<br>(96.4%)                                          | 0 (0%)                                                | 223<br>(99.6%)                                        | 927<br>(86.8%)                                            |
| Yes                                  | 0 (0%)                                               | 1 (0.5%)                                             | 1 (0.8%)                                                 | 0 (0%)                                                 | 0 (0%)                                               | 2 (0.9%)                                                | 0 (0%)                                                | 1 (0.4%)                                              | 5 (0.5%)                                                  |
| Missing                              | 2 (7.1%)                                             | 1 (0.5%)                                             | 7 (5.6%)                                                 | 2 (1.8%)                                               | 14<br>(27.5%)                                        | 6 (2.7%)                                                | 104<br>(100%)                                         | 0 (0%)                                                | 136<br>(12.7%)                                            |
| <b>Non-Ambulatory Cerebral Palsy</b> |                                                      |                                                      |                                                          |                                                        |                                                      |                                                         |                                                       |                                                       |                                                           |
| No                                   | 28<br>(100%)                                         | 195<br>(96.1%)                                       | 115<br>(92.7%)                                           | 101<br>(92.7%)                                         | 49<br>(96.1%)                                        | 219<br>(97.3%)                                          | 0 (0%)                                                | 222<br>(99.1%)                                        | 929<br>(87.0%)                                            |
| Yes                                  | 0 (0%)                                               | 7 (3.4%)                                             | 2 (1.6%)                                                 | 5 (4.6%)                                               | 2 (3.9%)                                             | 0 (0%)                                                  | 0 (0%)                                                | 2 (0.9%)                                              | 18 (1.7%)                                                 |
| Missing                              | 0 (0%)                                               | 1 (0.5%)                                             | 7 (5.6%)                                                 | 3 (2.8%)                                               | 0 (0%)                                               | 6 (2.7%)                                                | 104<br>(100%)                                         | 0 (0%)                                                | 121<br>(11.3%)                                            |
| <b>Child IQ &lt;70</b>               |                                                      |                                                      |                                                          |                                                        |                                                      |                                                         |                                                       |                                                       |                                                           |
| No                                   | 22<br>(78.6%)                                        | 168<br>(82.8%)                                       | 108<br>(87.1%)                                           | 0 (0%)                                                 | 39<br>(76.5%)                                        | 212<br>(94.2%)                                          | 99 (95.2%)                                            | 194<br>(86.6%)                                        | 842<br>(78.8%)                                            |
| Yes                                  | 3 (10.7%)                                            | 18 (8.9%)                                            | 13 (10.5%)                                               | 0 (0%)                                                 | 3 (5.9%)                                             | 7 (3.1%)                                                | 3 (2.9%)                                              | 25 (11.2%)                                            | 72 (6.7%)                                                 |
| Missing                              | 3 (10.7%)                                            | 17 (8.4%)                                            | 3 (2.4%)                                                 | 109<br>(100%)                                          | 9 (17.6%)                                            | 6 (2.7%)                                                | 2 (1.9%)                                              | 5 (2.2%)                                              | 154<br>(14.4%)                                            |

**eTable 2.** Newcastle Ottawa Criteria and Ratings for Each IPD Cohort

**Criteria:**

|                                                                                                                                                                  |                                                                                                                                         |  |  |  |  |  |  |
|------------------------------------------------------------------------------------------------------------------------------------------------------------------|-----------------------------------------------------------------------------------------------------------------------------------------|--|--|--|--|--|--|
| Newcastle Ottawa Rating Scale                                                                                                                                    | <a href="http://www.ohri.ca/programs/clinical_epidemiology/oxford.asp">http://www.ohri.ca/programs/clinical_epidemiology/oxford.asp</a> |  |  |  |  |  |  |
| <b>Selection</b>                                                                                                                                                 |                                                                                                                                         |  |  |  |  |  |  |
| 1) <u>Representativeness of the exposed cohort</u>                                                                                                               |                                                                                                                                         |  |  |  |  |  |  |
| A) truly representative of the average ___ VPT/VLBW (not a sub-selection such as just those with BPD or only males) in the community                             |                                                                                                                                         |  |  |  |  |  |  |
| B) somewhat representative of the average ___ VPT/VLBW in the community                                                                                          |                                                                                                                                         |  |  |  |  |  |  |
| C) selected group of users eg nurses, volunteers                                                                                                                 |                                                                                                                                         |  |  |  |  |  |  |
| D) no description of the derivation of the cohort                                                                                                                |                                                                                                                                         |  |  |  |  |  |  |
| 2) <u>Selection of the non exposed cohort</u>                                                                                                                    |                                                                                                                                         |  |  |  |  |  |  |
| A) drawn from the same community as the exposed cohort                                                                                                           |                                                                                                                                         |  |  |  |  |  |  |
| B) drawn from a different source                                                                                                                                 |                                                                                                                                         |  |  |  |  |  |  |
| C) no description of the derivation of the non exposed cohort                                                                                                    |                                                                                                                                         |  |  |  |  |  |  |
| 3) <u>Ascertainment of exposure</u>                                                                                                                              |                                                                                                                                         |  |  |  |  |  |  |
| A) secure record (eg surgical records)                                                                                                                           |                                                                                                                                         |  |  |  |  |  |  |
| B) structured interview                                                                                                                                          |                                                                                                                                         |  |  |  |  |  |  |
| C) written self report                                                                                                                                           |                                                                                                                                         |  |  |  |  |  |  |
| D) no description                                                                                                                                                |                                                                                                                                         |  |  |  |  |  |  |
| 4) <u>Demonstration that outcome of interest was not present at start of study (Was adult cognitive performance known when the participants were recruited?)</u> |                                                                                                                                         |  |  |  |  |  |  |
| A) yes                                                                                                                                                           |                                                                                                                                         |  |  |  |  |  |  |
| B) no                                                                                                                                                            |                                                                                                                                         |  |  |  |  |  |  |
| <b>Comparability</b>                                                                                                                                             |                                                                                                                                         |  |  |  |  |  |  |
| 1) <u>Comparability of cohorts on the basis of the design or analysis</u>                                                                                        |                                                                                                                                         |  |  |  |  |  |  |
| A) study controls for : ___ maternal education ___                                                                                                               |                                                                                                                                         |  |  |  |  |  |  |
| B) study controls for any additional factor: sex                                                                                                                 |                                                                                                                                         |  |  |  |  |  |  |
| <b>Outcome</b>                                                                                                                                                   |                                                                                                                                         |  |  |  |  |  |  |

|                                                                                                                                               |  |  |  |  |  |  |  |
|-----------------------------------------------------------------------------------------------------------------------------------------------|--|--|--|--|--|--|--|
| 1) <u>Assessment of outcome (Did the study use a standardised full-scale IQ assessment?)</u>                                                  |  |  |  |  |  |  |  |
| A) independent blind assessment                                                                                                               |  |  |  |  |  |  |  |
| B) record linkage                                                                                                                             |  |  |  |  |  |  |  |
| C) self report                                                                                                                                |  |  |  |  |  |  |  |
| D) no description                                                                                                                             |  |  |  |  |  |  |  |
| 2) <u>Was follow-up long enough for outcomes to occur (Did the cohort assess adult IQ outcomes?)</u>                                          |  |  |  |  |  |  |  |
| A) yes (17 years or greater)                                                                                                                  |  |  |  |  |  |  |  |
| B) no                                                                                                                                         |  |  |  |  |  |  |  |
| 3) <u>Adequacy of follow up of cohorts. (Of the potential VPT/VLBW participants eligible in adulthood, were over 50% of them assessed?)</u>   |  |  |  |  |  |  |  |
| A) complete follow up - all subjects accounted for                                                                                            |  |  |  |  |  |  |  |
| B) subjects lost to follow up unlikely to introduce bias - small number lost - > <u>50</u> % follow up, or description provided of those lost |  |  |  |  |  |  |  |
| C) follow up rate < <u>50</u> % and no description of those lost                                                                              |  |  |  |  |  |  |  |
| D) no statement                                                                                                                               |  |  |  |  |  |  |  |

**Criteria:**

| <u>Co<br/>hor<br/>t</u>                         | <u>Representativ<br/>eness of the<br/>exposed<br/>cohort</u> | <u>Selection of<br/>the non<br/>exposed<br/>cohort</u> | <u>Ascertain<br/>ment of<br/>exposur<br/>e</u> | <u>Demonstration that<br/>outcome of interest<br/>was not present at start<br/>of study</u> | <u>Comparability of<br/>cohorts on the basis<br/>of the design or<br/>analysis</u> | <u>Assess<br/>ment of<br/>outcom<br/>e</u> | <u>Was follow-up<br/>long enough for<br/>outcomes to<br/>occur</u> | <u>Adequacy of<br/>follow up of<br/>cohorts (above or<br/>below 50%)</u> | <u>Overal<br/>! Cohort<br/>Score</u> |
|-------------------------------------------------|--------------------------------------------------------------|--------------------------------------------------------|------------------------------------------------|---------------------------------------------------------------------------------------------|------------------------------------------------------------------------------------|--------------------------------------------|--------------------------------------------------------------------|--------------------------------------------------------------------------|--------------------------------------|
| <u>AY<br/>LS<sup>1</sup></u>                    | <u>A (regional)</u>                                          | <u>A</u>                                               | <u>A</u>                                       | <u>A</u>                                                                                    | <u>A</u>                                                                           | <u>A</u>                                   | <u>A</u>                                                           | <u>C</u>                                                                 | <u>8</u>                             |
| <u>BL<br/>S<sup>2,3</sup></u>                   | <u>A (regional)</u>                                          | <u>A</u>                                               | <u>A</u>                                       | <u>A</u>                                                                                    | <u>A</u>                                                                           | <u>A</u>                                   | <u>A</u>                                                           | <u>C</u>                                                                 | <u>8</u>                             |
| <u>EPI<br/>Cur<br/>e<sup>4,5</sup></u>          | <u>A (national)</u>                                          | <u>B</u>                                               | <u>A</u>                                       | <u>A</u>                                                                                    | <u>A</u>                                                                           | <u>A</u>                                   | <u>A</u>                                                           | <u>C</u>                                                                 | <u>7</u>                             |
| <u>HE<br/>SV<br/>A<sup>6</sup></u>              | <u>A (regional)</u>                                          | <u>A</u>                                               | <u>A</u>                                       | <u>A</u>                                                                                    | <u>A</u>                                                                           | <u>A</u>                                   | <u>A</u>                                                           | <u>C</u>                                                                 | <u>8</u>                             |
| <u>NT<br/>NU<br/>7</u>                          | <u>A (regional)</u>                                          | <u>B</u>                                               | <u>A</u>                                       | <u>A</u>                                                                                    | <u>A</u>                                                                           | <u>A</u>                                   | <u>A</u>                                                           | <u>B</u>                                                                 | <u>7</u>                             |
| <u>NZ<br/>V<br/>LB<br/>W<sup>8</sup></u>        | <u>A (national)</u>                                          | <u>B</u>                                               | <u>A</u>                                       | <u>A</u>                                                                                    | <u>A</u>                                                                           | <u>A</u>                                   | <u>A</u>                                                           | <u>B</u>                                                                 | <u>8</u>                             |
| <u>UC<br/>LH<sup>9</sup><br/>,<sup>10</sup></u> | <u>A (regional)</u>                                          | <u>B</u>                                               | <u>A</u>                                       | <u>A</u>                                                                                    | <u>A</u>                                                                           | <u>A</u>                                   | <u>A</u>                                                           | <u>B</u>                                                                 | <u>8</u>                             |
| <u>VIC<br/>S<sup>11</sup></u>                   | <u>A (regional)</u>                                          | <u>A</u>                                               | <u>A</u>                                       | <u>A</u>                                                                                    | <u>A</u>                                                                           | <u>A</u>                                   | <u>A</u>                                                           | <u>B</u>                                                                 | <u>9</u>                             |

**eTable 3.** Linear Mixed Model Demonstrating Reducing Gestational Age by Birth Year Among VPT/VLBW Participants

| <b>VPT/VLBW only analysis</b>                        |                                |               |                  |
|------------------------------------------------------|--------------------------------|---------------|------------------|
|                                                      | <b>Gestational Age (weeks)</b> |               |                  |
| <i>Predictors</i>                                    | <i>Estimates</i>               | <i>CI</i>     | <i>p</i>         |
| (Intercept – Estimate for 1978)                      | 32.07                          | 29.66 – 34.49 | <b>&lt;0.001</b> |
| Birth year – per year post 1978                      | -0.32                          | -0.60 – -0.04 | <b>0.025</b>     |
| Observations                                         | 1068                           |               |                  |
| Marginal R <sup>2</sup> / Conditional R <sup>2</sup> | 0.222 / 0.488                  |               |                  |

**eTable 4.** Linear Mixed Model Demonstrating Reducing Birth Weight by Birth Year Among VPT/VLBW Participants

| <b>VPT/VLBW only analysis</b>                        |                        |                   |                  |
|------------------------------------------------------|------------------------|-------------------|------------------|
|                                                      | <b>Birthweight (g)</b> |                   |                  |
| <i>Predictors</i>                                    | <i>Estimates</i>       | <i>CI</i>         | <i>p</i>         |
| (Intercept – Estimate for 1978)                      | 1464.87                | 1211.59 – 1718.14 | <b>&lt;0.001</b> |
| Birth year – per year post 1978                      | -29.85                 | -58.78 – -0.91    | <b>0.043</b>     |
| Observations                                         | 1068                   |                   |                  |
| Marginal R <sup>2</sup> / Conditional R <sup>2</sup> | 0.164 / 0.411          |                   |                  |

**eTable 5.** IQ and Demographic Information of All Participants From Each IPD Cohort

| <b>Cohort</b>                       | <b>AYLS</b>               |                               | <b>BLS</b>                |                                 | <b>EPICURE</b>           |                                     | <b>HESVA</b>             |                                      | <b>NTNU</b>              |                                    | <b>NZVLBW</b>              |                                 | <b>UCLH</b>              |                                     | <b>VICS</b>                |                                 |
|-------------------------------------|---------------------------|-------------------------------|---------------------------|---------------------------------|--------------------------|-------------------------------------|--------------------------|--------------------------------------|--------------------------|------------------------------------|----------------------------|---------------------------------|--------------------------|-------------------------------------|----------------------------|---------------------------------|
| <b>Group</b>                        | <b>Cons<br/>n= 303</b>    | <b>VPT/<br/>VLBW<br/>n=28</b> | <b>Cons<br/>n= 192</b>    | <b>VPT/<br/>VLBW<br/>n= 203</b> | <b>Cons<br/>n=64</b>     | <b>VPT/<br/>VLB<br/>W<br/>n=124</b> | <b>Cons<br/>n=98</b>     | <b>VPT/<br/>VLB<br/>W<br/>n= 109</b> | <b>Cons<br/>n=75</b>     | <b>VPT/<br/>VLB<br/>W<br/>n=51</b> | <b>Cons<br/>n=<br/>100</b> | <b>VPT/<br/>VLBW<br/>n= 225</b> | <b>Cons<br/>n= 89</b>    | <b>VPT<br/>/VLB<br/>W<br/>n=104</b> | <b>Cons<br/>n=<br/>146</b> | <b>VPT/<br/>VLBW<br/>n= 224</b> |
| <b>IQ Z<br/>Score</b>               |                           |                               |                           |                                 |                          |                                     |                          |                                      |                          |                                    |                            |                                 |                          |                                     |                            |                                 |
| <b>Mean<br/>(SD)</b>                | <u>0.00</u><br>(0.94)     | <u>-0.95</u><br>(1.21)        | <u>0.00</u><br>(0.75)     | <u>-0.83</u><br>(1.04)          | <u>0.00</u><br>(0.64)    | <u>-1.06</u><br>(0.96)              | <u>0.00</u><br>(0.84)    | <u>-0.57</u><br>(1.06)               | <u>0.00</u><br>(0.70)    | <u>-0.86</u><br>(1.15)             | <u>0.00</u><br>(0.78)      | <u>-0.78</u><br>(1.00)          | <u>0.00</u><br>(0.89)    | <u>-0.64</u><br>(1.00)              | <u>0.00</u><br>(0.84)      | <u>-0.67</u><br>(1.01)          |
| <b>Sex</b>                          |                           |                               |                           |                                 |                          |                                     |                          |                                      |                          |                                    |                            |                                 |                          |                                     |                            |                                 |
| <b>Male</b>                         | <u>134</u><br>(44.2%<br>) | <u>16</u><br>(57.1%<br>)      | <u>92</u><br>(47.9%<br>)  | <u>108</u><br>(53.2%<br>)       | <u>25</u><br>(39.1<br>%) | <u>56</u><br>(45.2%<br>)            | <u>42</u><br>(42.9<br>%) | <u>47</u><br>(43.1%<br>)             | <u>33</u><br>(44.0<br>%) | <u>25</u><br>(49.0%<br>)           | <u>37</u><br>(37.0<br>%)   | <u>100</u><br>(44.4%<br>)       | <u>42</u><br>(47.2<br>%) | <u>63</u><br>(60.6%<br>)            | <u>56</u><br>(38.4<br>%)   | <u>96</u><br>(42.9%<br>)        |
| <b>Female</b>                       | <u>169</u><br>(55.8%<br>) | <u>12</u><br>(42.9%<br>)      | <u>100</u><br>(52.1%<br>) | <u>95</u><br>(46.8%<br>)        | <u>39</u><br>(60.9<br>%) | <u>68</u><br>(54.8%<br>)            | <u>56</u><br>(57.1<br>%) | <u>62</u><br>(56.9%<br>)             | <u>42</u><br>(56.0<br>%) | <u>26</u><br>(51.0%<br>)           | <u>63</u><br>(63.0<br>%)   | <u>125</u><br>(55.6%<br>)       | <u>47</u><br>(52.8<br>%) | <u>41</u><br>(39.4%<br>)            | <u>90</u><br>(61.6<br>%)   | <u>128</u><br>(57.1%<br>)       |
| <b>Maternal<br/>Education Level</b> |                           |                               |                           |                                 |                          |                                     |                          |                                      |                          |                                    |                            |                                 |                          |                                     |                            |                                 |
| <b>Low</b>                          | <u>52</u><br>(17.2%<br>)  | <u>7</u><br>(25.0%<br>)       | <u>87</u><br>(45.3%<br>)  | <u>61</u><br>(30.0%<br>)        | <u>4</u><br>(6.2%<br>)   | <u>23</u><br>(18.5%<br>)            | <u>13</u><br>(13.3<br>%) | <u>17</u><br>(15.6%<br>)             | <u>2</u><br>(2.7%<br>)   | <u>2</u><br>(3.9%<br>)             | <u>4</u><br>(4.0%<br>)     | <u>85</u><br>(37.8%<br>)        | <u>3</u><br>(3.4%<br>)   | <u>3</u><br>(2.9%<br>)              | <u>9</u><br>(6.2%<br>)     | <u>47</u><br>(21.0%<br>)        |
| <b>Medium</b>                       | <u>101</u><br>(33.3%<br>) | <u>9</u><br>(32.1%<br>)       | <u>72</u><br>(37.5%<br>)  | <u>112</u><br>(55.2%<br>)       | <u>48</u><br>(75.0<br>%) | <u>90</u><br>(72.6%<br>)            | <u>56</u><br>(57.1<br>%) | <u>64</u><br>(58.7%<br>)             | <u>31</u><br>(41.3<br>%) | <u>22</u><br>(43.1%<br>)           | <u>33</u><br>(33.0<br>%)   | <u>68</u><br>(30.2%<br>)        | <u>23</u><br>(25.8<br>%) | <u>40</u><br>(38.5%<br>)            | <u>34</u><br>(23.3<br>%)   | <u>57</u><br>(25.4%<br>)        |



|                |                       |                      |                      |                      |                      |                    |                      |                      |                      |                      |                      |                      |                      |                      |                      |                      |
|----------------|-----------------------|----------------------|----------------------|----------------------|----------------------|--------------------|----------------------|----------------------|----------------------|----------------------|----------------------|----------------------|----------------------|----------------------|----------------------|----------------------|
| <u>High</u>    | <u>148</u><br>(48.8%) | <u>12</u><br>(42.9%) | <u>32</u><br>(16.7%) | <u>27</u><br>(13.3%) | <u>12</u><br>(18.8%) | <u>4</u><br>(3.2%) | <u>29</u><br>(29.6%) | <u>26</u><br>(23.9%) | <u>28</u><br>(37.3%) | <u>16</u><br>(31.4%) | <u>63</u><br>(63.0%) | <u>64</u><br>(28.4%) | <u>39</u><br>(43.8%) | <u>20</u><br>(19.2%) | <u>26</u><br>(17.8%) | <u>24</u><br>(10.7%) |
| <u>Missing</u> | <u>2</u><br>(0.7%)    | <u>0</u> (0%)        | <u>1</u><br>(0.5%)   | <u>3</u><br>(1.5%)   | <u>0</u> (0%)        | <u>7</u><br>(5.6%) | <u>0</u> (0%)        | <u>2</u><br>(1.8%)   | <u>14</u><br>(18.7%) | <u>11</u><br>(21.6%) | <u>0</u> (0%)        | <u>8</u><br>(3.6%)   | <u>24</u><br>(27.0%) | <u>41</u><br>(39.4%) | <u>77</u><br>(52.7%) | <u>96</u><br>(42.9%) |

**eTable 6.** Neonatal and Demographic Data for VPT/VLBW Participants from Each IPD Cohort

|                                             | <b>AYLS</b><br><b>VPT/<br/>VLBW</b><br><b>(n=28)</b> | <b>BLS</b><br><b>VPT/<br/>VLBW</b><br><b>(n=203)</b> | <b>EPICURE</b><br><b>VPT/<br/>VLBW</b><br><b>(n=124)</b> | <b>HESVA</b><br><b>VPT/<br/>VLBW</b><br><b>(n=109)</b> | <b>NTNU</b><br><b>VPT/<br/>VLBW</b><br><b>(n=51)</b> | <b>NZVLBW</b><br><b>VPT/<br/>VLBW</b><br><b>(n=225)</b> | <b>UCLH</b><br><b>VPT/<br/>VLBW</b><br><b>(n=104)</b> | <b>VICS</b><br><b>VPT/<br/>VLBW</b><br><b>(n=224)</b> | <b>Overall</b><br><b>VPT/<br/>VLBW</b><br><b>(n=1068)</b> |
|---------------------------------------------|------------------------------------------------------|------------------------------------------------------|----------------------------------------------------------|--------------------------------------------------------|------------------------------------------------------|---------------------------------------------------------|-------------------------------------------------------|-------------------------------------------------------|-----------------------------------------------------------|
| <b>Gestational Age (weeks)</b>              |                                                      |                                                      |                                                          |                                                        |                                                      |                                                         |                                                       |                                                       |                                                           |
| Mean (SD)                                   | 29.6 (2.09)                                          | 30.4<br>(2.05)                                       | 24.5<br>(0.748)                                          | 29.3<br>(2.33)                                         | 29.0<br>(2.49)                                       | 29.3<br>(2.50)                                          | 28.8 (2.00)                                           | 26.6<br>(1.99)                                        | 28.3<br>(2.81)                                            |
| <b>Birthweight Z Score</b>                  |                                                      |                                                      |                                                          |                                                        |                                                      |                                                         |                                                       |                                                       |                                                           |
| Mean (SD)                                   | -0.00903<br>(1.08)                                   | -0.603<br>(1.20)                                     | 0.230<br>(0.822)                                         | -0.421<br>(1.00)                                       | -0.182<br>(1.08)                                     | -0.607<br>(1.07)                                        | -0.0826<br>(0.930)                                    | -0.167<br>(1.07)                                      | -0.311<br>(1.09)                                          |
| <b>Multiple Birth</b>                       |                                                      |                                                      |                                                          |                                                        |                                                      |                                                         |                                                       |                                                       |                                                           |
| Singleton                                   | 25 (89.3%)                                           | 149<br>(73.4%)                                       | 83<br>(66.9%)                                            | 92<br>(84.4%)                                          | 41<br>(80.4%)                                        | 169<br>(75.1%)                                          | 81 (77.9%)                                            | 150<br>(67.0%)                                        | 790<br>(74.0%)                                            |
| Multiple                                    | 3 (10.7%)                                            | 54<br>(26.6%)                                        | 40<br>(32.3%)                                            | 17<br>(15.6%)                                          | 10<br>(19.6%)                                        | 56<br>(24.9%)                                           | 19 (18.3%)                                            | 74<br>(33.0%)                                         | 273<br>(25.6%)                                            |
| Missing                                     | 0 (0%)                                               | 0 (0%)                                               | 1 (0.8%)                                                 | 0 (0%)                                                 | 0 (0%)                                               | 0 (0%)                                                  | 4 (3.8%)                                              | 0 (0%)                                                | 5 (0.5%)                                                  |
| <b>Intraventricular Haemorrhage</b>         |                                                      |                                                      |                                                          |                                                        |                                                      |                                                         |                                                       |                                                       |                                                           |
| No Grade                                    | 23 (82.1%)                                           | 161<br>(79.3%)                                       | 44<br>(35.5%)                                            | 69<br>(63.3%)                                          | 38<br>(74.5%)                                        | 158<br>(70.2%)                                          | 48 (46.2%)                                            | 152<br>(67.9%)                                        | 693<br>(64.9%)                                            |
| Any Grade                                   | 5 (17.9%)                                            | 41<br>(20.2%)                                        | 79<br>(63.7%)                                            | 14<br>(12.8%)                                          | 5 (9.8%)                                             | 52<br>(23.1%)                                           | 55 (52.9%)                                            | 72<br>(32.1%)                                         | 323<br>(30.2%)                                            |
| Missing                                     | 0 (0%)                                               | 1 (0.5%)                                             | 1 (0.8%)                                                 | 26<br>(23.9%)                                          | 8 (15.7%)                                            | 15 (6.7%)                                               | 1 (1.0%)                                              | 0 (0%)                                                | 52 (4.9%)                                                 |
| <b>Bronchopulmonary Dysplasia Diagnosed</b> |                                                      |                                                      |                                                          |                                                        |                                                      |                                                         |                                                       |                                                       |                                                           |
| No                                          | 27 (96.4%)                                           | 101<br>(49.8%)                                       | 35<br>(28.2%)                                            | 80<br>(73.4%)                                          | 39<br>(76.5%)                                        | 181<br>(80.4%)                                          | 0 (0%)                                                | 138<br>(61.6%)                                        | 601<br>(56.3%)                                            |
| Yes                                         | 1 (3.6%)                                             | 102<br>(50.2%)                                       | 89<br>(71.8%)                                            | 25<br>(22.9%)                                          | 10<br>(19.6%)                                        | 44<br>(19.6%)                                           | 0 (0%)                                                | 86<br>(38.4%)                                         | 357<br>(33.4%)                                            |
| Missing                                     | 0 (0%)                                               | 0 (0%)                                               | 0 (0%)                                                   | 4 (3.7%)                                               | 2 (3.9%)                                             | 0 (0%)                                                  | 104 (100%)                                            | 0 (0%)                                                | 110<br>(10.3%)                                            |
| <b>ISCED Maternal Education</b>             |                                                      |                                                      |                                                          |                                                        |                                                      |                                                         |                                                       |                                                       |                                                           |
| Low                                         | 7 (25.0%)                                            | 61<br>(30.0%)                                        | 23<br>(18.5%)                                            | 17<br>(15.6%)                                          | 2 (3.9%)                                             | 85<br>(37.8%)                                           | 3 (2.9%)                                              | 47<br>(21.0%)                                         | 245<br>(22.9%)                                            |
| Medium                                      | 9 (32.1%)                                            | 112<br>(55.2%)                                       | 90<br>(72.6%)                                            | 64<br>(58.7%)                                          | 22<br>(43.1%)                                        | 68<br>(30.2%)                                           | 40 (38.5%)                                            | 57<br>(25.4%)                                         | 462<br>(43.3%)                                            |

|                     |                  |                  |                  |                  |                  |                  |                  |                  |                  |
|---------------------|------------------|------------------|------------------|------------------|------------------|------------------|------------------|------------------|------------------|
| High                | 12 (42.9%)       | 27<br>(13.3%)    | 4 (3.2%)         | 26<br>(23.9%)    | 16<br>(31.4%)    | 64<br>(28.4%)    | 20 (19.2%)       | 24<br>(10.7%)    | 193<br>(18.1%)   |
| Missing             | 0 (0%)           | 3 (1.5%)         | 7 (5.6%)         | 2 (1.8%)         | 11<br>(21.6%)    | 8 (3.6%)         | 41 (39.4%)       | 96<br>(42.9%)    | 168<br>(15.7%)   |
| <b>Birth Year</b>   |                  |                  |                  |                  |                  |                  |                  |                  |                  |
| Mean (SD)           | 1985.3<br>(0.46) | 1985.2<br>(0.41) | 1995.0<br>(0.00) | 1982.4<br>(2.10) | 1987.2<br>(0.74) | 1986.0<br>(0.00) | 1982.1<br>(1.83) | 1991.6<br>(0.50) | 1987.4<br>(4.24) |
| <b>Age Assessed</b> |                  |                  |                  |                  |                  |                  |                  |                  |                  |
| Mean (SD)           | 25.8<br>(0.49)   | 26.2<br>(0.59)   | 19.3<br>(0.55)   | 24.5<br>(2.08)   | 26.3<br>(0.67)   | 28.4<br>(1.09)   | 30.5<br>(2.42)   | 17.9<br>(0.79)   | 24.4<br>(4.55)   |

**eTable 7.** Study Characteristics of VPT/VLBW Cohorts Not Included in the IPD Meta-analysis

| <b>Cohort</b>                        | <b>Birth year</b> | <b>IQ Test</b>  | <b>VPT/VLBW</b>                  |            | <b>Controls</b>     |            | <b>Age at assessment, M (SD)</b> |
|--------------------------------------|-------------------|-----------------|----------------------------------|------------|---------------------|------------|----------------------------------|
|                                      |                   |                 | <b>IQ, M (SD)</b>                | <b>n</b>   | <b>IQ, M (SD)</b>   | <b>n</b>   |                                  |
| <u>Constable (2013)<sup>12</sup></u> | <u>1990</u>       | <u>WISC TIQ</u> | <u>91.7 (12.4)</u>               | <u>19</u>  | <u>100.4 (18.7)</u> | <u>19</u>  | <u>20.1 (0.9)</u>                |
| <u>Hack (2002)<sup>13</sup></u>      | <u>1977</u>       | <u>WAIS-R</u>   | <u>86.87(14.23)<sup>A</sup></u>  | <u>236</u> | <u>92(14.4)</u>     | <u>231</u> | <u>20</u>                        |
| <u>Hallin 2010)<sup>14</sup></u>     | <u>1985</u>       | <u>WAIS-III</u> | <u>93 (15.4)</u>                 | <u>52</u>  | <u>106 (12.5)</u>   | <u>54</u>  | <u>18.4(0.2)</u>                 |
| <u>Lefebvre (2005)<sup>15</sup></u>  | <u>1976</u>       | <u>WAIS-R</u>   | <u>94(12)</u>                    | <u>59</u>  | <u>108(14)</u>      | <u>44</u>  | <u>18.1(1.8)</u>                 |
| <u>Stålnacke (2015)<sup>16</sup></u> | <u>1988</u>       | <u>WISC-III</u> | <u>-0.315(1.165)<sup>B</sup></u> | <u>118</u> | <u>0(1)</u>         | <u>91</u>  | <u>18</u>                        |

A = Derived from weighted average of the male and female reported scores. Age at assessment SD not stated.

B = Derived from the combined Z score for verbal and non-verbal ability. Age at assessment SD not stated.

## eReferences

1. Matinolli HM, Hovi P, Levalahti E, et al. Neonatal nutrition predicts energy balance in young adults born preterm at very low birth weight. *Nutrients*. 2017;9 (12) (no pagination)(1282). doi:10.3390/nu9121282
2. Eryigit Madzwamuse S, Baumann N, Jaekel J, Bartmann P, Wolke D. Neuro-cognitive performance of very preterm or very low birth weight adults at 26 years. *Journal of Child Psychology and Psychiatry*. 2015;56(8):857-864. doi:10.1111/jcpp.12358
3. Wolke D, Meyer R. Cognitive status, language attainment, and prereading skills of 6-year-old very preterm children and their peers: the Bavarian Longitudinal Study. *Developmental Medicine and Child Neurology*. 1999;41(2):94-109.
4. Costeloe K, Hennessy E, Gibson AT, Marlow N, Wilkinson AR. The EPICure study: outcomes to discharge from hospital for infants born at the threshold of viability. *Pediatrics*. 2000;106(4):659-671.
5. Linsell L, Johnson S, Wolke D, et al. Cognitive trajectories from infancy to early adulthood following birth before 26 weeks of gestation: a prospective, population-based cohort study. *Archives of Disease in Childhood*. 2018;103(4):363-370. doi:10.1136/archdischild-2017-313414
6. Pyhälä R. Psychological and psychophysiological functioning of young adults born preterm: The Helsinki Study of Very Low Birth Weight Adults. Published online 2012.
7. Lærum AMW, Reitan SK, Evensen KAI, et al. Psychiatric symptoms and risk factors in adults born preterm with very low birthweight or born small for gestational age at term. *BMC Psychiatry*. 2019;19(1):223. doi:10.1186/s12888-019-2202-8
8. Darlow BA, Horwood LJ, Woodward LJ, et al. The New Zealand 1986 very low birth weight cohort as young adults: mapping the road ahead. *BMC Pediatr*. 2015;15:90. doi:10.1186/s12887-015-0413-9
9. Stewart AL, Reynolds EOR, Hope PL, et al. Probability of Neurodevelopmental Disorders Estimated from Ultrasound Appearance of Brains of Very Preterm Infants. *Developmental Medicine & Child Neurology*. 1987;29(1):3-11. doi:10.1111/j.1469-8749.1987.tb02101.x
10. Kroll J, Karolis V, Brittain PJ, et al. Real-Life Impact of Executive Function Impairments in Adults Who Were Born Very Preterm. *Journal of the International Neuropsychological Society*. 2017;23(5):381-389. doi:10.1017/S1355617717000169
11. Victorian Infant Collaborative Study Group. Outcome at 2 years of children 23–27 weeks' gestation born in Victoria in 1991–92. *Journal of Paediatrics and Child Health*. 1997;33(2):161-165.
12. Constable RT, Vohr BR, Scheinost D, et al. A left cerebellar pathway mediates language in prematurely-born young adults. *Neuroimage*. 2013;64:371-378.
13. Hack M, Flannery DJ, Schluchter M, Cartar L, Borawski E, Klein N. Outcomes in young adulthood for very-low-birth-weight infants. *N Engl J Med*. 2002;346(3):149-157. doi:10.1056/NEJMoa010856
14. Hallin A-L, Hellström-Westas L, Stjernqvist K. Follow-up of adolescents born extremely preterm: cognitive function and health at 18 years of age. *Acta Paediatr*. 2010;99(9):1401-1406. doi:10.1111/j.1651-2227.2010.01850.x
15. Lefebvre F, Mazurier E, Tessier R. Cognitive and educational outcomes in early adulthood for infants weighing 1000 grams or less at birth. *Acta Paediatr*. 2005;94(6):733-740. doi:10.1111/j.1651-2227.2005.tb01973.x
16. Stålnacke J, Lundequist A, Böhm B, Forssberg H, Smedler A-C. Individual cognitive patterns and developmental trajectories after preterm birth. *Child Neuropsychol*. 2015;21(5):648-667. doi:10.1080/09297049.2014.958071
